# Supplementary material for: Epithelial-Mesenchymal Transition in Keratocystic Odontogenic Tumor: Possible Role in Locally Aggressive Behavior
Source: Hindawi journal article supplement (doi:10.1155/2015/168089), 2015-01-01
Supplement: f1 [file 168089.f1.pdf]

**Supplementary Information:**

**TABLE S1: Summary of clinical features of keratocystic odontogenic tumor patients.**

| <b>Patient NO.</b> | <b>Gender</b> | <b>Age (years)</b> | <b>Location</b> | <b>Therapy</b>   |
|--------------------|---------------|--------------------|-----------------|------------------|
| <b>1</b>           | <b>M</b>      | <b>41</b>          | <b>Mandible</b> | <b>Curettage</b> |
| <b>2</b>           | <b>F</b>      | <b>43</b>          | <b>Mandible</b> | <b>Curettage</b> |
| <b>3</b>           | <b>F</b>      | <b>36</b>          | <b>Mandible</b> | <b>Curettage</b> |
| <b>4</b>           | <b>M</b>      | <b>35</b>          | <b>Mandible</b> | <b>Curettage</b> |
| <b>5</b>           | <b>M</b>      | <b>41</b>          | <b>Maxilla</b>  | <b>Curettage</b> |
| <b>6</b>           | <b>M</b>      | <b>35</b>          | <b>Mandible</b> | <b>Curettage</b> |
| <b>7</b>           | <b>F</b>      | <b>38</b>          | <b>Mandible</b> | <b>Curettage</b> |
| <b>8</b>           | <b>F</b>      | <b>27</b>          | <b>Mandible</b> | <b>Curettage</b> |
| <b>9</b>           | <b>M</b>      | <b>68</b>          | <b>Mandible</b> | <b>Curettage</b> |
| <b>10</b>          | <b>M</b>      | <b>12</b>          | <b>Mandible</b> | <b>Curettage</b> |
| <b>11</b>          | <b>F</b>      | <b>28</b>          | <b>Mandible</b> | <b>Curettage</b> |
| <b>12</b>          | <b>F</b>      | <b>35</b>          | <b>Mandible</b> | <b>Curettage</b> |
| <b>13</b>          | <b>F</b>      | <b>54</b>          | <b>Mandible</b> | <b>Curettage</b> |
| <b>14</b>          | <b>M</b>      | <b>71</b>          | <b>Mandible</b> | <b>Curettage</b> |
| <b>15</b>          | <b>M</b>      | <b>14</b>          | <b>Mandible</b> | <b>Curettage</b> |
| <b>16</b>          | <b>M</b>      | <b>24</b>          | <b>Mandible</b> | <b>Curettage</b> |
| <b>17</b>          | <b>F</b>      | <b>34</b>          | <b>Mandible</b> | <b>Curettage</b> |
| <b>18</b>          | <b>M</b>      | <b>18</b>          | <b>Maxilla</b>  | <b>Curettage</b> |
| <b>19</b>          | <b>F</b>      | <b>44</b>          | <b>Mandible</b> | <b>Curettage</b> |

|           |          |           |                 |                  |
|-----------|----------|-----------|-----------------|------------------|
| <b>20</b> | <b>M</b> | <b>34</b> | <b>Mandible</b> | <b>Curettage</b> |
| <b>21</b> | <b>F</b> | <b>28</b> | <b>Mandible</b> | <b>Curettage</b> |
| <b>22</b> | <b>F</b> | <b>44</b> | <b>Mandible</b> | <b>Curettage</b> |
| <b>23</b> | <b>M</b> | <b>21</b> | <b>Mandible</b> | <b>Curettage</b> |
| <b>24</b> | <b>F</b> | <b>21</b> | <b>Mandible</b> | <b>Curettage</b> |
| <b>25</b> | <b>F</b> | <b>44</b> | <b>Mandible</b> | <b>Curettage</b> |
| <b>26</b> | <b>F</b> | <b>21</b> | <b>Mandible</b> | <b>Curettage</b> |
| <b>27</b> | <b>F</b> | <b>30</b> | <b>Mandible</b> | <b>Curettage</b> |
| <b>28</b> | <b>M</b> | <b>14</b> | <b>Mandible</b> | <b>Curettage</b> |
| <b>29</b> | <b>F</b> | <b>38</b> | <b>Mandible</b> | <b>Curettage</b> |
| <b>30</b> | <b>M</b> | <b>35</b> | <b>Mandible</b> | <b>Curettage</b> |
| <b>31</b> | <b>M</b> | <b>41</b> | <b>Mandible</b> | <b>Curettage</b> |
| <b>32</b> | <b>M</b> | <b>71</b> | <b>Mandible</b> | <b>Curettage</b> |
| <b>33</b> | <b>F</b> | <b>33</b> | <b>Maxilla</b>  | <b>Curettage</b> |
| <b>34</b> | <b>M</b> | <b>38</b> | <b>Mandible</b> | <b>Curettage</b> |
| <b>35</b> | <b>F</b> | <b>21</b> | <b>Mandible</b> | <b>Curettage</b> |
| <b>36</b> | <b>M</b> | <b>18</b> | <b>Mandible</b> | <b>Curettage</b> |
| <b>37</b> | <b>F</b> | <b>44</b> | <b>Mandible</b> | <b>Curettage</b> |
| <b>38</b> | <b>M</b> | <b>31</b> | <b>Mandible</b> | <b>Curettage</b> |
| <b>39</b> | <b>F</b> | <b>34</b> | <b>Mandible</b> | <b>Curettage</b> |
| <b>40</b> | <b>M</b> | <b>58</b> | <b>Mandible</b> | <b>Curettage</b> |

**TABLE S2: Summary of clinical features of radicular cyst patients.**

| <b>Patient NO.</b> | <b>Gender</b> | <b>Age (years)</b> | <b>Location</b> | <b>Therapy</b>   |
|--------------------|---------------|--------------------|-----------------|------------------|
| <b>1</b>           | <b>M</b>      | <b>71</b>          | <b>Mandible</b> | <b>Curettage</b> |
| <b>2</b>           | <b>F</b>      | <b>55</b>          | <b>Mandible</b> | <b>Curettage</b> |
| <b>3</b>           | <b>M</b>      | <b>19</b>          | <b>Maxilla</b>  | <b>Curettage</b> |
| <b>4</b>           | <b>M</b>      | <b>19</b>          | <b>Mandible</b> | <b>Curettage</b> |
| <b>5</b>           | <b>M</b>      | <b>46</b>          | <b>Mandible</b> | <b>Curettage</b> |
| <b>6</b>           | <b>M</b>      | <b>13</b>          | <b>Mandible</b> | <b>Curettage</b> |
| <b>7</b>           | <b>M</b>      | <b>31</b>          | <b>Mandible</b> | <b>Curettage</b> |
| <b>8</b>           | <b>F</b>      | <b>51</b>          | <b>Mandible</b> | <b>Curettage</b> |
| <b>9</b>           | <b>M</b>      | <b>24</b>          | <b>Mandible</b> | <b>Curettage</b> |
| <b>10</b>          | <b>F</b>      | <b>49</b>          | <b>Mandible</b> | <b>Curettage</b> |
| <b>11</b>          | <b>M</b>      | <b>63</b>          | <b>Mandible</b> | <b>Curettage</b> |
| <b>12</b>          | <b>F</b>      | <b>59</b>          | <b>Maxilla</b>  | <b>Curettage</b> |
| <b>13</b>          | <b>F</b>      | <b>21</b>          | <b>Mandible</b> | <b>Curettage</b> |
| <b>14</b>          | <b>M</b>      | <b>45</b>          | <b>Mandible</b> | <b>Curettage</b> |
| <b>15</b>          | <b>M</b>      | <b>49</b>          | <b>Mandible</b> | <b>Curettage</b> |
| <b>16</b>          | <b>F</b>      | <b>64</b>          | <b>Mandible</b> | <b>Curettage</b> |
| <b>17</b>          | <b>F</b>      | <b>17</b>          | <b>Mandible</b> | <b>Curettage</b> |
| <b>18</b>          | <b>F</b>      | <b>46</b>          | <b>Mandible</b> | <b>Curettage</b> |
| <b>19</b>          | <b>M</b>      | <b>36</b>          | <b>Mandible</b> | <b>Curettage</b> |
| <b>20</b>          | <b>F</b>      | <b>32</b>          | <b>Mandible</b> | <b>Curettage</b> |

**TABLE S3: Primer Sequences Used for Real-time Quantitative PCR.**

| <b>Gene</b>                    | <b>Forward (5'-3')</b>           | <b>Reverse (5'-3')</b>             |
|--------------------------------|----------------------------------|------------------------------------|
| 18s rRNA                       | CGGCTACCACATCCAAG<br>GAA         | GCTGGAATTACCGCGGCT                 |
| E-cadherin                     | GCTGAGCTGGACAGGGA<br>GGA         | ATGGGGGCGTTGTCATTAC                |
| N-cadherin                     | AGGGCCTTAAAGCTGCTG<br>ACA        | TCATAGTCGAAGACTAAAAGGGAGTC<br>ATAT |
| Vimentin                       | TCCAGCAGCTTCCTGTAG<br>GT         | CCCTCACCTGTGAAGTGGAT               |
| Slug                           | AGCAGTTGCACTGTGATG<br>CC         | ACACAGCAGCCAGATTCCTC               |
| <b>TGF-<math>\beta</math>1</b> | <b>GGGACTATCCACCTGCA<br/>AGA</b> | <b>CCTCCTTGGCGTAGTAGTCG</b>        |
